# Supplementary material
Source: MDPI journal article supplement (https://www.mdpi.com/2673-3994/4/2/10)
Supplement: s1 [file s1]

---

# Standard-Compliant Gasoline by Upgrading a DTG-Based Fuel through Hydroprocessing the Heavy-Ends and Blending of Oxygenates

David Graf, Philipp Neuner and Reinhard Rauch

Karlsruhe Institute of Technology (KIT), Engler-Bunte-Institute, Division of Fuel Technology (EBI-ceb), Engler-Bunte-Ring 1a, 76131 Karlsruhe, Germany

## Supplementary Materials

**Table S1.** Composition of bioliq<sup>®</sup> LG in vol.%.

| C-Nr.        | Naph.       | Paraf.       | Cycl Ol.    | Olef.       | Arom.        | Oxyg.       | Total         |
|--------------|-------------|--------------|-------------|-------------|--------------|-------------|---------------|
| 4            | -           | 0.90         | -           | 0.05        | -            | -           | <b>0.94</b>   |
| 5            | 0.08        | 2.81         | -           | 0.15        | -            | 0.02        | <b>3.06</b>   |
| 6            | 0.38        | 4.68         | 0.04        | 0.25        | 1.44         | 0.04        | <b>6.82</b>   |
| 7            | 1.16        | 3.26         | 0.20        | 0.24        | 15.96        | -           | <b>20.81</b>  |
| 8            | 2.39        | 2.22         | 0.49        | 0.20        | 43.14        | -           | <b>48.44</b>  |
| 9            | 1.22        | 0.85         | 0.40        | 0.15        | 16.26        | -           | <b>18.89</b>  |
| 10           | 0.21        | 0.32         | 0.12        | 0.02        | 0.08         | -           | <b>0.76</b>   |
| 11+          | -           | 0.25         | -           | -           | -            | -           | <b>0.25</b>   |
| Poly         | 0.02        | -            | -           | -           | -            | -           | <b>0.02</b>   |
| <b>Total</b> | <b>5.46</b> | <b>15.29</b> | <b>1.26</b> | <b>1.05</b> | <b>76.88</b> | <b>0.06</b> | <b>100.00</b> |

**Table S2.** Composition of HG-HP@270 °C in vol.%.

| C-Nr.        | Naph.        | i-Par.      | n-Par.      | Cycl Ol.    | Olef. | Arom.       | Total         |
|--------------|--------------|-------------|-------------|-------------|-------|-------------|---------------|
| 4            | -            | 0.16        | 0.14        | -           | -     | -           | <b>0.30</b>   |
| 5            | 0.01         | 0.46        | 0.47        | -           | -     | -           | <b>0.94</b>   |
| 6            | 0.48         | 0.71        | 0.47        | -           | -     | 0.01        | <b>1.67</b>   |
| 7            | 1.38         | 0.23        | 0.09        | -           | -     | 0.05        | <b>1.76</b>   |
| 8            | 2.14         | 0.16        | 0.03        | -           | -     | 0.37        | <b>2.70</b>   |
| 9            | 38.66        | 0.13        | -           | 0.02        | -     | 0.06        | <b>38.87</b>  |
| 10           | 51.99        | 0.01        | 0.10        | 0.03        | -     | 0.01        | <b>52.14</b>  |
| 11           | 0.08         | 0.04        | -           | -           | -     | -           | <b>0.12</b>   |
| 12+          | 0.84         | -           | -           | -           | -     | 0.02        | <b>0.86</b>   |
| Poly         | 0.63         | -           | -           | -           | -     | -           | <b>0.63</b>   |
| <b>Total</b> | <b>96.21</b> | <b>1.90</b> | <b>1.29</b> | <b>0.05</b> | -     | <b>0.53</b> | <b>100.00</b> |

**Table S3.** Composition of HG-HP@310 °C in vol.%.

| <b>C-Nr.</b> | <b>Naph.</b> | <b>i-Par.</b> | <b>n-Par.</b> | <b>Cycl Ol.</b> | <b>Olef.</b> | <b>Arom.</b> | <b>Total</b>  |
|--------------|--------------|---------------|---------------|-----------------|--------------|--------------|---------------|
| <b>4</b>     | -            | 1.34          | 0.53          | -               | -            | -            | <b>1.87</b>   |
| <b>5</b>     | 0.18         | 2.52          | 3.68          | -               | -            | -            | <b>6.39</b>   |
| <b>6</b>     | 3.67         | 4.77          | 4.00          | 0.01            | -            | 0.17         | <b>12.63</b>  |
| <b>7</b>     | 4.85         | 0.59          | 0.20          | -               | -            | 0.62         | <b>6.27</b>   |
| <b>8</b>     | 4.60         | 0.25          | 0.17          | -               | -            | 0.51         | <b>5.53</b>   |
| <b>9</b>     | 22.86        | 0.12          | 0.06          | -               | -            | 0.26         | <b>23.30</b>  |
| <b>10</b>    | 39.71        | 0.06          | 0.02          | -               | -            | 0.05         | <b>39.84</b>  |
| <b>11</b>    | 0.36         | 0.39          | 0.05          | -               | -            | -            | <b>0.80</b>   |
| <b>12+</b>   | 2.32         | -             | -             | -               | -            | 0.01         | <b>2.34</b>   |
| <b>Poly</b>  | 1.04         | -             | -             | -               | -            | -            | <b>1.04</b>   |
| <b>Total</b> | <b>79.59</b> | <b>10.04</b>  | <b>8.72</b>   | <b>0.01</b>     | -            | <b>1.64</b>  | <b>100.00</b> |

**Table S4.** Composition of HG-HP@330 °C in vol.%.

| <b>C-Nr.</b> | <b>Naph.</b> | <b>i-Par.</b> | <b>n-Par.</b> | <b>Cycl Ol.</b> | <b>Olef.</b> | <b>Arom.</b> | <b>Total</b>  |
|--------------|--------------|---------------|---------------|-----------------|--------------|--------------|---------------|
| <b>4</b>     | -            | 1.45          | 1.09          | -               | -            | -            | <b>2.55</b>   |
| <b>5</b>     | 0.25         | 3.84          | 8.30          | -               | -            | -            | <b>12.39</b>  |
| <b>6</b>     | 4.09         | 8.22          | 8.68          | -               | -            | 0.01         | <b>21.00</b>  |
| <b>7</b>     | 4.57         | 0.39          | 0.15          | -               | -            | 0.02         | <b>5.14</b>   |
| <b>8</b>     | 3.25         | 0.18          | 0.01          | -               | -            | 0.19         | <b>3.63</b>   |
| <b>9</b>     | 27.59        | 0.08          | -             | 0.02            | -            | 0.07         | <b>27.75</b>  |
| <b>10</b>    | 26.19        | 0.08          | -             | 0.03            | -            | 0.07         | <b>26.36</b>  |
| <b>11</b>    | 0.41         | 0.02          | 0.04          | -               | -            | -            | <b>0.46</b>   |
| <b>12+</b>   | 0.53         | -             | -             | -               | -            | 0.04         | <b>0.57</b>   |
| <b>Poly</b>  | 0.14         | -             | -             | -               | -            | -            | <b>0.14</b>   |
| <b>Total</b> | <b>67.02</b> | <b>14.26</b>  | <b>18.27</b>  | <b>0.05</b>     | -            | <b>0.39</b>  | <b>100.00</b> |

**Table S5.** Composition of FT-HP in vol.%.

| C-Nr. | Naph. | i-Par. | n-Par. | Cycl Ol. | Olef. | Arom. | Total |
|-------|-------|--------|--------|----------|-------|-------|-------|
| 4     | -     | 0.98   | 1.82   | -        | -     | -     | 2.80  |
| 5     | 0.07  | 8.94   | 10.40  | -        | -     | -     | 19.41 |
| 6     | 0.70  | 15.50  | 11.78  | -        | 0.02  | -     | 27.99 |
| 7     | 1.42  | 13.56  | 6.60   | -        | 0.01  | 0.04  | 21.63 |
| 8     | 1.34  | 10.59  | 3.34   | -        | 0.01  | 0.03  | 15.31 |
| 9     | 0.62  | 6.28   | 1.14   | -        | -     | 0.01  | 8.05  |
| 10    | 0.14  | 2.68   | 0.29   | -        | -     | 0.03  | 3.14  |
| 11    | -     | 0.72   | 0.30   | -        | -     | -     | 1.02  |
| 12+   | -     | 0.65   | -      | -        | -     | -     | 0.65  |
| Poly  | -     | -      | -      | -        | -     | -     | -     |
| Total | 4.29  | 59.89  | 35.67  | -        | 0.05  | 0.10  | 100   |

**Table S6.** Composition of bioliq<sup>®</sup> HG in vol.%.

| C-Nr. | Naph. | i-Par. | n-Par. | Cycl Ol. | Olef. | Arom. | Total  |
|-------|-------|--------|--------|----------|-------|-------|--------|
| 4     | -     | -      | -      | -        | -     | -     | -      |
| 5     | -     | 0.05   | 0.01   | -        | -     | -     | 0.06   |
| 6     | 0.02  | 0.11   | 0.01   | -        | -     | 0.02  | 0.16   |
| 7     | 0.03  | 0.08   | -      | -        | -     | 0.28  | 0.39   |
| 8     | 0.06  | 0.10   | -      | -        | -     | 1.09  | 1.26   |
| 9     | 0.13  | 0.03   | -      | 0.02     | -     | 32.78 | 32.97  |
| 10    | 0.48  | 0.06   | 0.06   | 0.08     | -     | 52.60 | 53.28  |
| 11    | 0.06  | 0.37   | 0.08   | 0.10     | 0.08  | -     | 0.68   |
| 12+   | -     | 0.95   | -      | -        | -     | 10.20 | 11.14  |
| Poly  | 0.06  | -      | -      | -        | -     | -     | 0.06   |
| Total | 0.84  | 1.75   | 0.16   | 0.19     | 0.08  | 96.97 | 100.00 |

**Table S7.** Composition of blend A in vol.%.

---

| <b>C-Nr.</b> | <b>Naph.</b> | <b>Paraf.</b> | <b>Cycl Ol.</b> | <b>Olef.</b> | <b>Arom.</b> | <b>Oxyg.</b> | <b>Total</b>  |
|--------------|--------------|---------------|-----------------|--------------|--------------|--------------|---------------|
| <b>1</b>     | -            | -             | -               | -            | -            | 3.10         | <b>3.10</b>   |
| <b>2</b>     | -            | -             | -               | -            | -            | 5.81         | <b>5.81</b>   |
| <b>3</b>     | -            | -             | -               | -            | -            | -            | -             |
| <b>4</b>     | -            | 2.17          | -               | 0.02         | -            | -            | <b>2.19</b>   |
| <b>5</b>     | 0.09         | 9.08          | -               | 0.07         | -            | 0.01         | <b>9.25</b>   |
| <b>6</b>     | 0.99         | 13.48         | 0.02            | 0.11         | 0.62         | 0.02         | <b>15.24</b>  |
| <b>7</b>     | 1.64         | 8.25          | 0.09            | 0.11         | 6.85         | -            | <b>16.94</b>  |
| <b>8</b>     | 1.90         | 5.69          | 0.22            | 0.10         | 18.52        | -            | <b>26.43</b>  |
| <b>9</b>     | 4.72         | 2.89          | 0.19            | 0.07         | 6.99         | -            | <b>14.86</b>  |
| <b>10</b>    | 3.97         | 1.16          | 0.06            | 0.01         | 0.04         | -            | <b>5.24</b>   |
| <b>11+</b>   | -            | 0.77          | -               | -            | 0.07         | -            | <b>0.84</b>   |
| <b>Poly</b>  | 0.09         | -             | -               | -            | -            | -            | <b>0.09</b>   |
| <b>Total</b> | <b>13.39</b> | <b>43.50</b>  | <b>0.58</b>     | <b>0.49</b>  | <b>33.09</b> | <b>8.95</b>  | <b>100.00</b> |

**Table S8.** Composition of blend B in vol.%.

---

| <b>C-Nr.</b> | <b>Naph.</b> | <b>Paraf.</b> | <b>Cycl Ol.</b> | <b>Olef.</b> | <b>Arom.</b> | <b>Oxyg.</b> | <b>Total</b>  |
|--------------|--------------|---------------|-----------------|--------------|--------------|--------------|---------------|
| <b>1</b>     | -            | -             | -               | -            | -            | 3.33         | <b>3.33</b>   |
| <b>2</b>     | -            | -             | -               | -            | -            | 0.51         | <b>0.51</b>   |
| <b>3</b>     | -            | -             | -               | -            | -            | -            | -             |
| <b>4</b>     | -            | 1.56          | -               | 1.23         | -            | 0.07         | <b>2.85</b>   |
| <b>5</b>     | 0.08         | 7.68          | -               | 0.41         | -            | 0.09         | <b>8.27</b>   |
| <b>6</b>     | 0.90         | 10.16         | 0.02            | 0.11         | 0.62         | 14.94        | <b>26.75</b>  |
| <b>7</b>     | 1.46         | 5.81          | 0.09            | 0.11         | 6.85         | 0.02         | <b>14.34</b>  |
| <b>8</b>     | 1.77         | 4.01          | 0.22            | 0.12         | 18.44        | -            | <b>24.56</b>  |
| <b>9</b>     | 4.61         | 2.00          | 0.19            | 0.08         | 6.94         | -            | <b>13.82</b>  |
| <b>10</b>    | 3.91         | 0.80          | 0.07            | 0.02         | 0.03         | -            | <b>4.82</b>   |
| <b>11+</b>   | -            | 0.65          | -               | -            | 0.05         | -            | <b>0.70</b>   |
| <b>Poly</b>  | 0.04         | -             | -               | -            | -            | -            | <b>0.04</b>   |
| <b>Total</b> | <b>12.77</b> | <b>32.66</b>  | <b>0.59</b>     | <b>2.07</b>  | <b>32.93</b> | <b>18.97</b> | <b>100.00</b> |
